# Supplementary material for: Genetic dissection of cell wall defects and the strigolactone pathway in Arabidopsis
Source: PubMed Central journal article supplement (PMC6589044; doi:10.1002/pld3.149), 2019-06-22
Supplement: PLD3-3-e00149-s001.pdf [file PLD3-3-e00149-s001.pdf]

|                    | Fuc       |      | Rha        |      | Ara        |      | Gal        |      | Glc        |      | Xyl          |      | Man        |      | GalA       |      | GlcA      |      | Cellulose    |      | Acetate    |      |
|--------------------|-----------|------|------------|------|------------|------|------------|------|------------|------|--------------|------|------------|------|------------|------|-----------|------|--------------|------|------------|------|
|                    | AVG       | SD S | AVG        | SD S | AVG        | SD S | AVG        | SD S | AVG        | SD S | AVG          | SD S | AVG        | SD S | AVG        | SD S | AVG       | SD S | AVG          | SD S | AVG        | SD S |
| <b>Col-0</b>       | 1.5 ± 0.2 | a    | 7.6 ± 0.8  | a    | 5.8 ± 1.2  | a    | 10.2 ± 1.2 | a    | 14.0 ± 1.3 | a    | 97.2 ± 5.2   | a    | 9.1 ± 1.1  | a    | 29.0 ± 4.2 | a    | 2.7 ± 0.5 | ad   | 361.1 ± 12.4 | ab   | 45.9 ± 1.5 | a    |
| <i>tbl29</i>       | 1.5 ± 0.1 | a    | 9.8 ± 0.7  | c    | 9.1 ± 1.1  | c    | 12.0 ± 1.0 | a    | 16.6 ± 1.8 | b    | 102.9 ± 11.7 | b    | 11.1 ± 1.0 | b    | 30.1 ± 1.2 | a    | 3.6 ± 0.7 | ac   | 309.7 ± 33.5 | b    | 27.3 ± 1.5 | bd   |
| <i>tbl29 max4</i>  | 1.3 ± 0.5 | a    | 7.0 ± 1.7  | a    | 5.7 ± 1.4  | a    | 9.0 ± 2.2  | a    | 15.1 ± 3.5 | b    | 90.7 ± 14.0  | a    | 8.6 ± 1.4  | a    | 29.7 ± 1.0 | a    | 4.7 ± 0.8 | bc   | 364.6 ± 33.2 | a    | 24.2 ± 2.8 | b    |
| <i>irx3</i>        | 1.7 ± 0.2 | a    | 11.9 ± 0.6 | b    | 19.8 ± 2.2 | d    | 15.4 ± 1.1 | b    | 9.5 ± 1.5  | ac   | 159.5 ± 10.6 | c    | 6.4 ± 0.4  | c    | 38.8 ± 2.5 | b    | 4.3 ± 1.1 | c    | 91.6 ± 15.5  | c    | 72.6 ± 3.7 | c    |
| <i>irx3 max4</i>   | 1.9 ± 0.2 | a    | 11.7 ± 0.8 | b    | 13.7 ± 2.7 | b    | 14.3 ± 1.4 | b    | 10.5 ± 1.0 | c    | 155.8 ± 12.6 | c    | 7.2 ± 0.4  | c    | 37.1 ± 4.6 | b    | 5.5 ± 0.9 | c    | 120.5 ± 7.6  | d    | 73.7 ± 4.4 | c    |
| <i>parvus</i>      | 2.5 ± 0.2 | b    | 11.2 ± 0.4 | bc   | 13.1 ± 0.9 | b    | 21.1 ± 1.4 | c    | 21.1 ± 4.2 | b    | 47.7 ± 2.7   | d    | 16.6 ± 1.1 | d    | 35.3 ± 2.6 | b    | 1.0 ± 0.4 | d    | 309.4 ± 14.9 | b    | 31.7 ± 1.5 | d    |
| <i>parvus max4</i> | 2.6 ± 0.1 | b    | 11.6 ± 0.3 | b    | 13.7 ± 1.1 | b    | 20.7 ± 1.2 | c    | 20.2 ± 3.7 | b    | 46.2 ± 3.4   | d    | 15.7 ± 1.6 | d    | 35.5 ± 1.7 | b    | 1.4 ± 0.4 | d    | 327.7 ± 9.1  | e    | 31.6 ± 1.9 | d    |

**Supp. Table 1. Effect of *max4* mutation in the cell wall composition of *irx3* and *parvus*.** Monosaccharide composition, cellulose and acetate content of stem cell walls. Data are represented as mean (AVG) ± the standard deviation (SD) of biological replicates (n=5). Means with different letters are significantly different (Tukey's HSD, p<0.05) in the significance (S) column.

Fuc=Fucose; Rha=Rhamnose; Ara=Arabinose; Gal=Galactose; Glc=Glucose; Xyl=Xylose; Man=Mannose; GalA; Galacturonic Acid; GlcA= Glucuronic Acid

|                   | Fuc          | Rha           | Ara          | Gal          | Glc          | Xyl            | Man           | GalA          | GlcA           | Cellulose       | Acetate      |
|-------------------|--------------|---------------|--------------|--------------|--------------|----------------|---------------|---------------|----------------|-----------------|--------------|
|                   | AVG ± SD S   | AVG ± SD S    | AVG ± SD S   | AVG ± SD S   | AVG ± SD S   | AVG ± SD S     | AVG ± SD S    | AVG ± SD S    | AVG ± SD S     |                 |              |
| Col-0             | 1.3 ± 0.1 a  | 8.9 ± 0.2 a   | 7.6 ± 0.5 a  | 13.7 ± 0.6 a | 17.8 ± 1.6 a | 92.3 ± 9.9 a   | 9.1 ± 1.0 ab  | 39.7 ± 1.9 ab | 1.9 ± 1.00 ad  | 357.9 ± 15.3 ab | 38.4 ± 1.5 a |
| <i>tbl29</i>      | 1.3 ± 0.1 a  | 10.1 ± 0.8 b  | 9.1 ± 0.9 a  | 14.6 ± 1.2 a | 17.5 ± 3.5 a | 94.6 ± 9.2 a   | 9.0 ± 0.7 ab  | 45.4 ± 4.5 bc | 3.9 ± 0.21 abc | 310.1 ± 23.4 bd | 21.5 ± 0.9 b |
| <i>max4</i>       | 1.3 ± 0.1 a  | 8.7 ± 0.4 ac  | 7.6 ± 0.6 a  | 13.7 ± 0.8 a | 18.9 ± 2.2 a | 100.5 ± 6.2 a  | 9.6 ± 0.7 ac  | 37.9 ± 2.9 ab | 3.5 ± 0.42 abc | 360.1 ± 12.3 a  | 39.9 ± 0.9 a |
| <i>tbl29 max4</i> | 1.2 ± 0.1 a  | 8.2 ± 0.7 ac  | 6.9 ± 0.5 a  | 12.0 ± 1.0 a | 19.6 ± 2.5 a | 91.1 ± 9.0 a   | 8.6 ± 0.8 ac  | 36.5 ± 3.7 ab | 5.0 ± 0.74 bc  | 362.2 ± 8.9 a   | 20.3 ± 1.9 b |
| <i>irx1</i>       | 1.5 ± 0.0 b  | 12.7 ± 0.4 de | 21.3 ± 2.8 b | 23.6 ± 1.5 b | 21.9 ± 2.7 a | 176.0 ± 5.2 b  | 12.2 ± 1.0 b  | 51.2 ± 2.6 cd | 5.1 ± 1.91 c   | 88.0 ± 5.5 c    | 60.8 ± 1.7 c |
| <i>irx1 max4</i>  | 1.5 ± 0.0 ab | 11.8 ± 0.5 de | 14.6 ± 1.1 c | 20.8 ± 0.7 c | 18.3 ± 1.6 a | 171.8 ± 14.7 b | 10.4 ± 0.9 bc | 49.6 ± 2.1 cd | 5.0 ± 1.10 c   | 118.3 ± 23.5 d  | 62.1 ± 2.6 c |
| <i>irx9</i>       | 1.6 ± 0.1 b  | 13.3 ± 0.4 e  | 14.3 ± 1.0 c | 23.6 ± 1.1 b | 27.7 ± 2.0 b | 55.2 ± 4.4 c   | 21.4 ± 1.0 d  | 52.8 ± 2.6 cd | 1.0 ± 0.67 d   | 315.7 ± 15.0 b  | 34.8 ± 1.9 d |
| <i>irx9 max4</i>  | 1.8 ± 0.1 b  | 13.3 ± 0.4 e  | 15.5 ± 1.3 c | 24.6 ± 0.9 b | 32.6 ± 3.6 b | 55.7 ± 1.4 c   | 23.0 ± 1.1 d  | 52.0 ± 2.2 d  | 0.8 0.50 d     | 359.8 ± 26.4 a  | 34.7 ± 1.6 d |

**Supp. Table 2. Effect of *max4* mutation in the cell wall composition of *irx1* and *irx9*.**

Monosaccharide composition, cellulose and acetate content of stem cell walls. Data are represented as mean (AVG) ± the standard deviation (SD) of biological replicates (n=5). Means with different letters are significantly different (Tukey's HSD, p<0.05) in the significance (S) column.

Fuc=Fucose; Rha=Rhamnose; Ara=Arabinose; Gal=Galactose; Glc=Glucose; Xyl=Xylose; Man=Mannose; GalA; Galacturonic Acid; GlcA= Glucuronic Acid

| <b>Mutant</b>  | <b>FW</b>                | <b>RV</b>                  | <b>T-DNA</b>                 |
|----------------|--------------------------|----------------------------|------------------------------|
| <i>tbl29-1</i> | AATTTGCAAGCAAAGCATCAC    | TGGGTTTTTGATAACGAGACG      | GCCTTTTCAGAAATGGATAAATA      |
| <i>max4-7</i>  | GTATGAGAAACTTCTTGTCGAGGA | GCGAGAGAGAGAAACTGACATTAT   | CCGCAATGAGTTGGCTATTCTC       |
| <i>irx1-5</i>  | ACAGGATGCGTGATACGGTAG    | ATCCATCCAAATCTCAATCCC      | ATTTTGCCGATTTTCGGAAC         |
| <i>irx3-5</i>  | AGAGAAGCTTAAGGAAACCGC    | GAACAACACAAGAGCAGAGGG      | ATTTTGCCGATTTTCGGAAC         |
| <i>irx3-6</i>  | TCTTACAATGCATTACTCGCTCAC | TGTGATTTAGTAGCTGGCCATTGT   | ATAATAACGCTGCGGACATCTACATTTT |
| <i>irx9-2</i>  | GCTGGTAAGGCCTCATTITTC    | AACTTACCAACCCACCCATTC      | ATTTTGCCGATTTTCGGAAC         |
| <i>parvus</i>  | GTTGAAGTAGCATGCTTTCCG    | TATGCACAGACAAACATAGCG      | ATTTTGCCGATTTTCGGAAC         |
| <i>irx4-2</i>  | CGAAGCTCTTTACTTTTCGTCCAC | TTTCACCAATTAATACCTCATTTCAC | ATAATAACGCTGCGGACATCTACATTTT |
| <i>magI3</i>   | AAAACACATCAAAACGATGCC    | CTCTCCTTGAATCAGCGAGTG      | ATTTTGCCGATTTTCGGAAC         |

**Supp. Table 3. Primers used to genotype the T-DNA mutants.**

FW: Forward gene-specific primer; RV: Reverse gene-specific primer; T-DNA: T-DNA-specific primer

| Primer name | Sequence                                                              |
|-------------|-----------------------------------------------------------------------|
| ixr2-1 Fout | TGCCACTGGGGGTAAAAG                                                    |
| ixr2-1 Rout | TCATAAAAGATTACAGATTGAAA                                               |
| ixr2-1 Fin  | TCTTACACTTCTTTGGGTCC                                                  |
| ixr2-1 Rin  | CCACAAACGGATTAACCCA                                                   |
| prc1-1 F    | GTGGCTGCGGATAAGAAGAA                                                  |
| prc1-1 R    | GCGCAGATGCTACAAATAC                                                   |
| max2-1 F    | CCCAAAGCTCTCAAAGATGC                                                  |
| max2-1 R    | CAATAATCATGCTCGCTCAAGCTCAAGCTTCCAATTCGGGTCAAGAAGAATCTTTCCATAAACTCAAAT |
| max3-9 F    | AGGTGTATTTAAGATGCCA                                                   |
| max3-9 R    | CACAAAATGTGAAGTTGCTT                                                  |
| max1 F      | CCTGATGTCTTCTCCGTTCTTG                                                |
| max1 R      | GGCTGATAGAGAGATAGGATGGT                                               |
| max2-2 F    | TCGCTCTTACCCAAAG                                                      |
| max2-2 R    | GGCTACACGAACCAAT                                                      |

**Supp. Table 4. Primers used to genotype the EMS mutants.**

| <b>Mutant</b>      | <b>Stock ID</b>      |
|--------------------|----------------------|
| <i>tbl29-1</i>     | sail_856_G11         |
| <i>max4-7</i>      | Ramirez et al., 2018 |
| <i>irx1-5</i>      | SALK_026812C         |
| <i>irx3-1</i>      | N104                 |
| <i>irx3-5</i>      | SALK_029940C         |
| <i>irx3-6</i>      | N483791              |
| <i>irx9-2</i>      | SALK_057033          |
| <i>parvus</i>      | SALK_045368C         |
| <i>parvus/glz1</i> | N16279               |
| <i>irx4-1</i>      | N19                  |
| <i>irx4-2</i>      | N347577/GK-622C01    |
| <i>magl3</i>       | SALK_023077          |
| <i>max1</i>        | N9564                |
| <i>max2-1</i>      | CS9565               |
| <i>max2-2</i>      | CS9566               |
| <i>max3-9</i>      | CS9567               |

**Supp. Table 5. Stock numbers (ABRC/NASC) of the mutants described.**
